# Supplementary material for: Assessing the impact of land surface dynamics and meteorological forcings on land surface temperature characteristics in West Africa
Source: Research Square preprint supplement (doi:10.21203/rs.3.rs-3404287/v1), 2023-10-03
Supplement: Supplementary file 1 [file 68beefb1c041d4b6a1fa9ec6.docx]

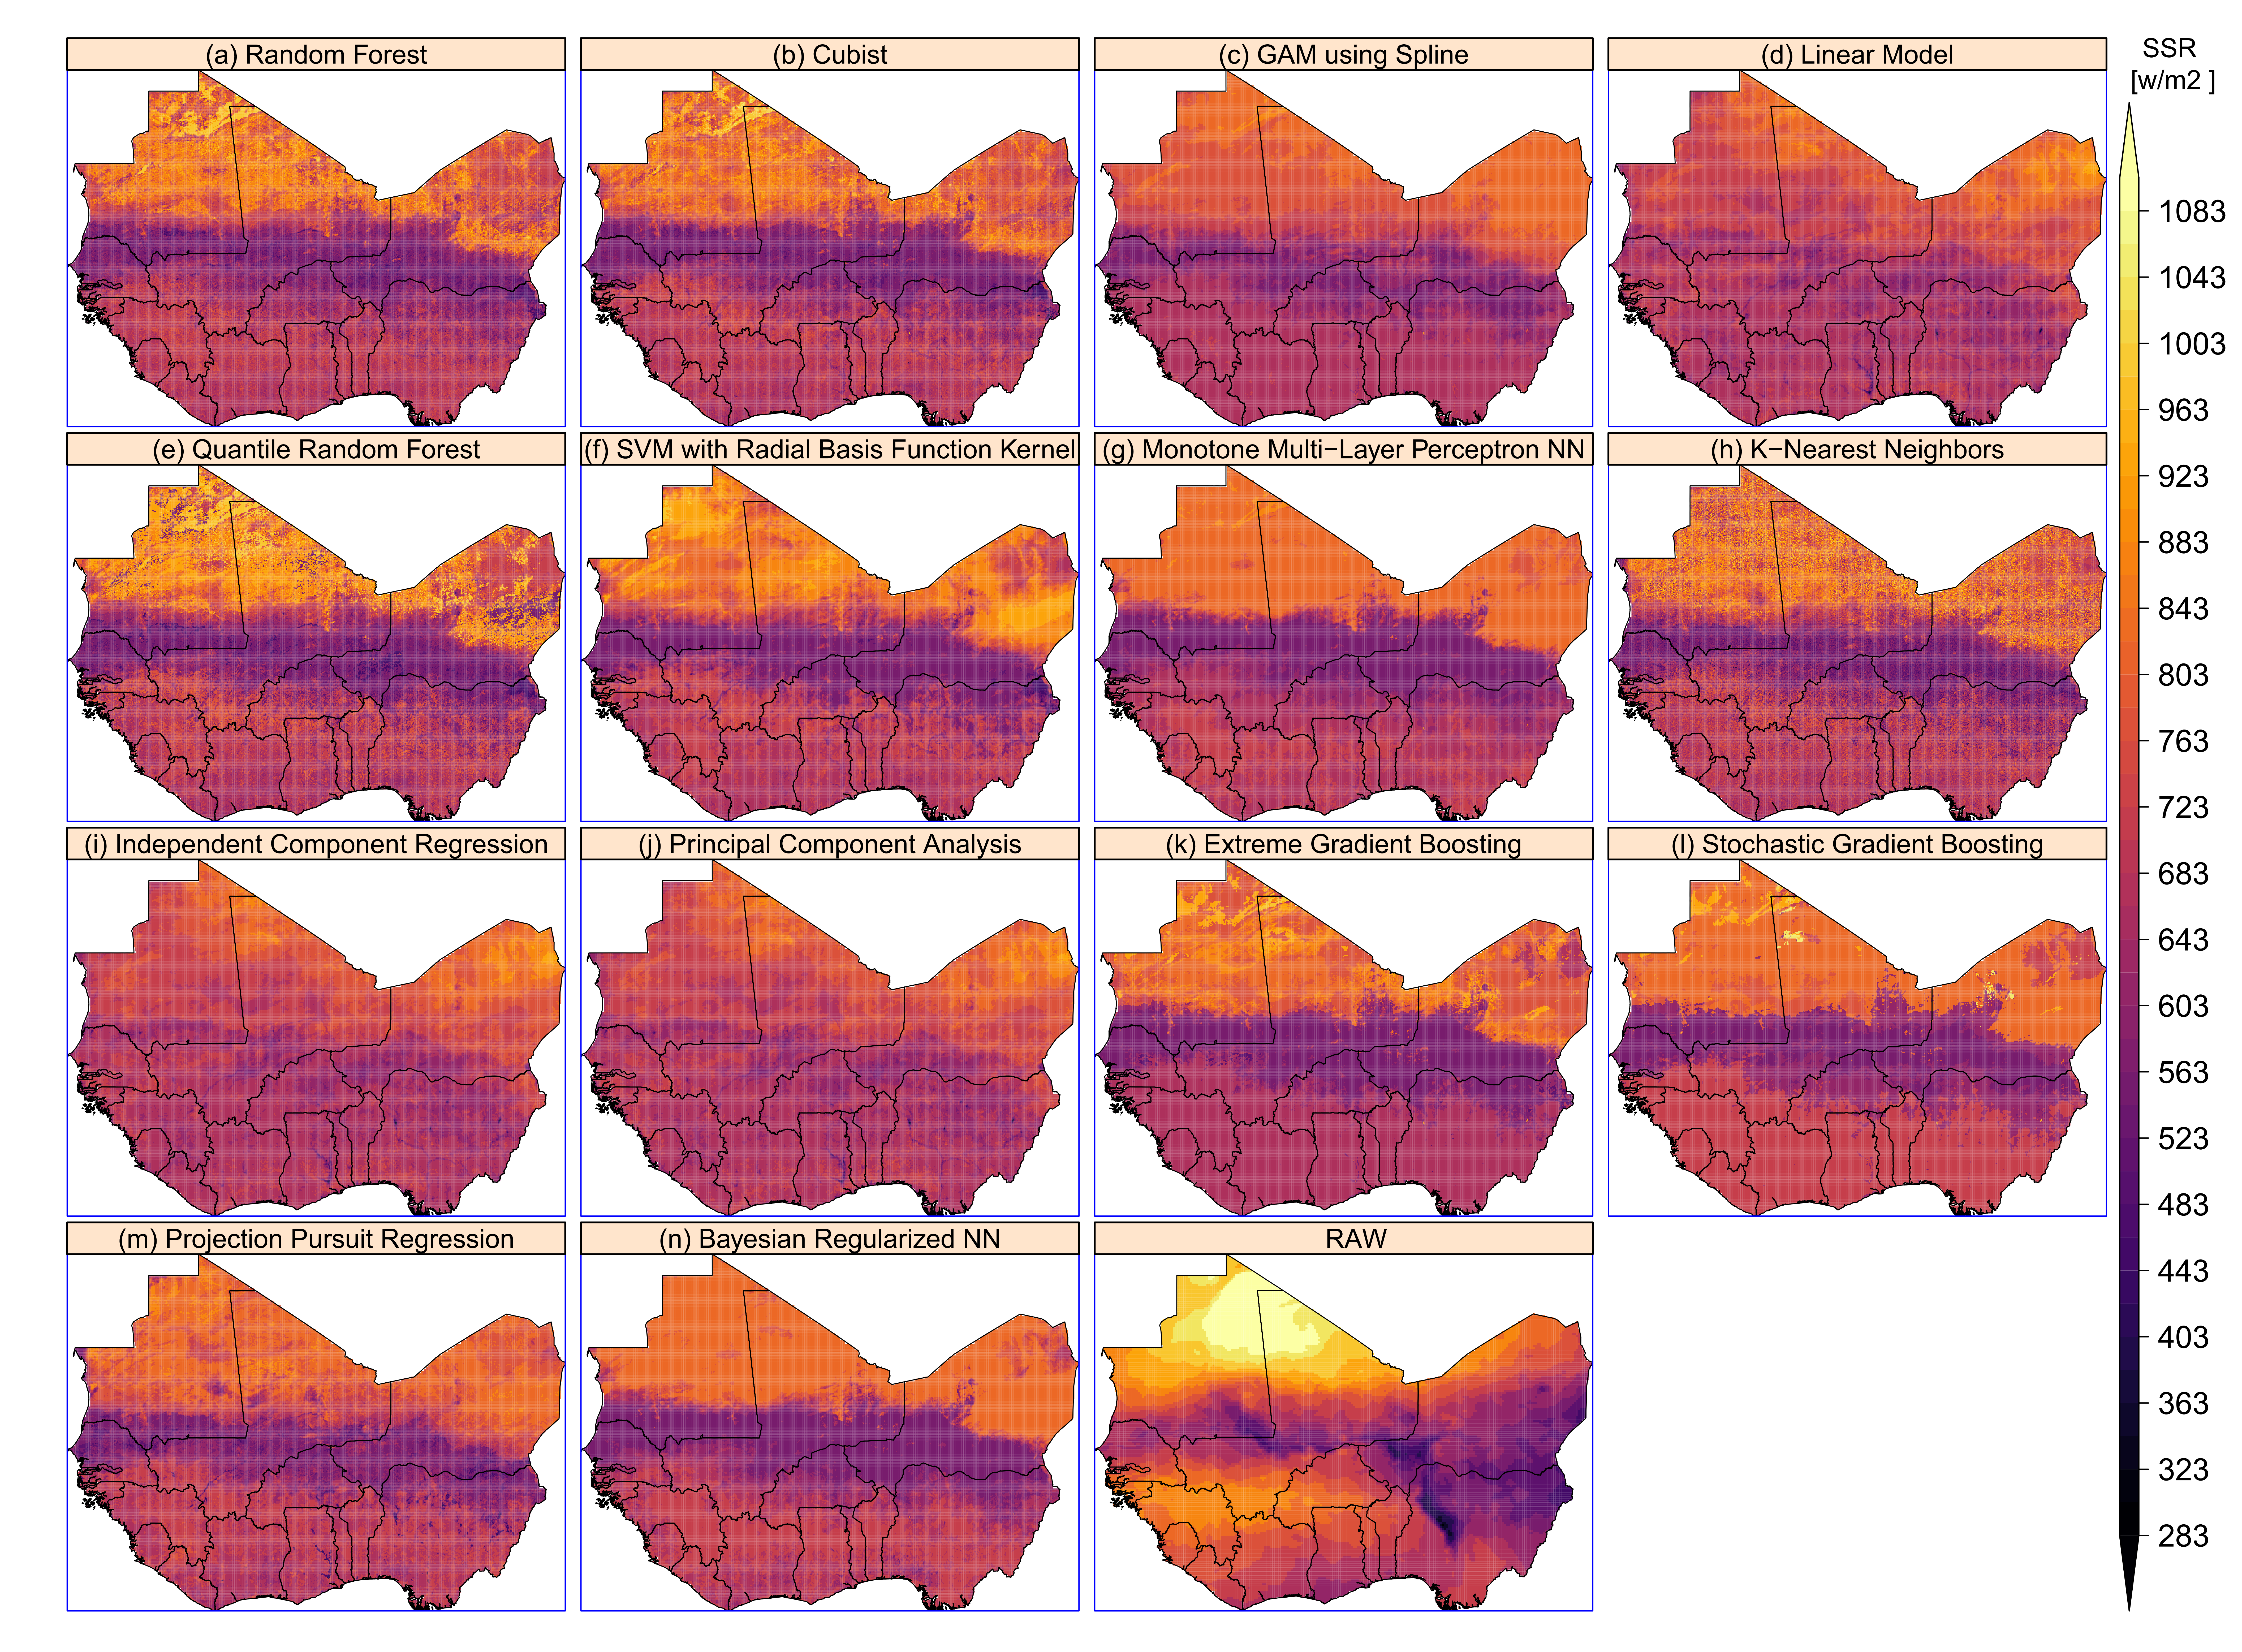


Fig. S1: Spatial distribution of ML models in downscaling SSR to 500 m during the wet season. Raw means the coarse data





Fig. S2: Performance and spread of the training set of different models in the wet season





Fig S3: Relationship between annual LST, NDVI and topography-dependent variables for the guinea coast





Fig S4: Relationship between annual LST, NDVI and topography-dependent variables for Savannah





Fig S5: Relationship between annual LST, NDVI and topography-dependent variables for West Africa
